# Supplementary material
Source: PubMed Central journal article supplement (PMC8741755)
Supplement: NIHMS1754004-supplement-2.pdf [file NIHMS1754004-supplement-2.pdf]

# Figure S1

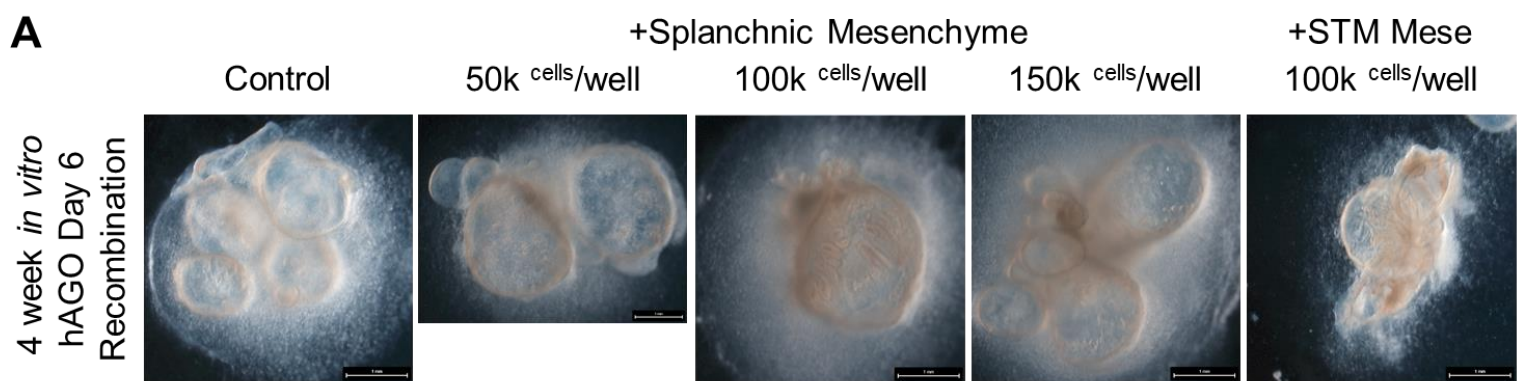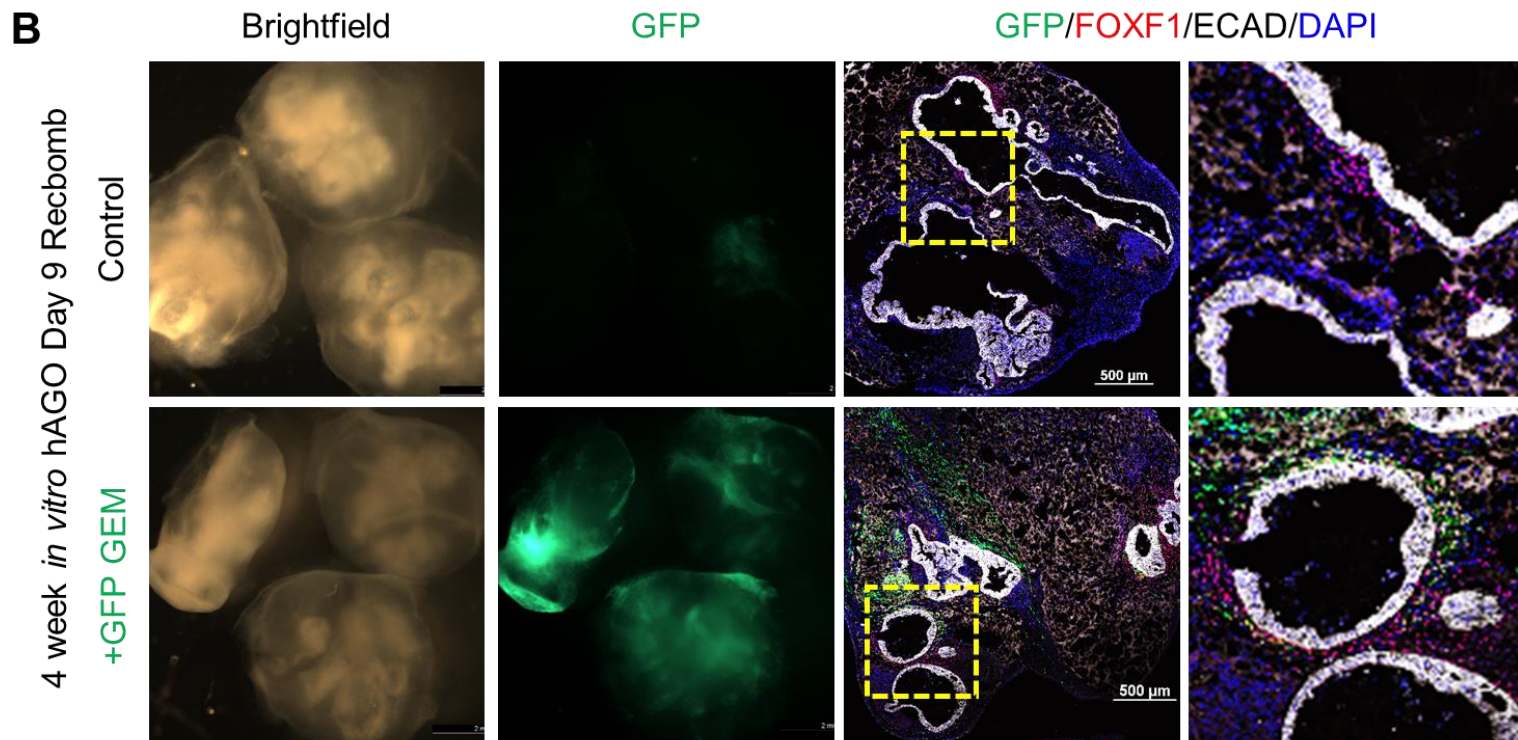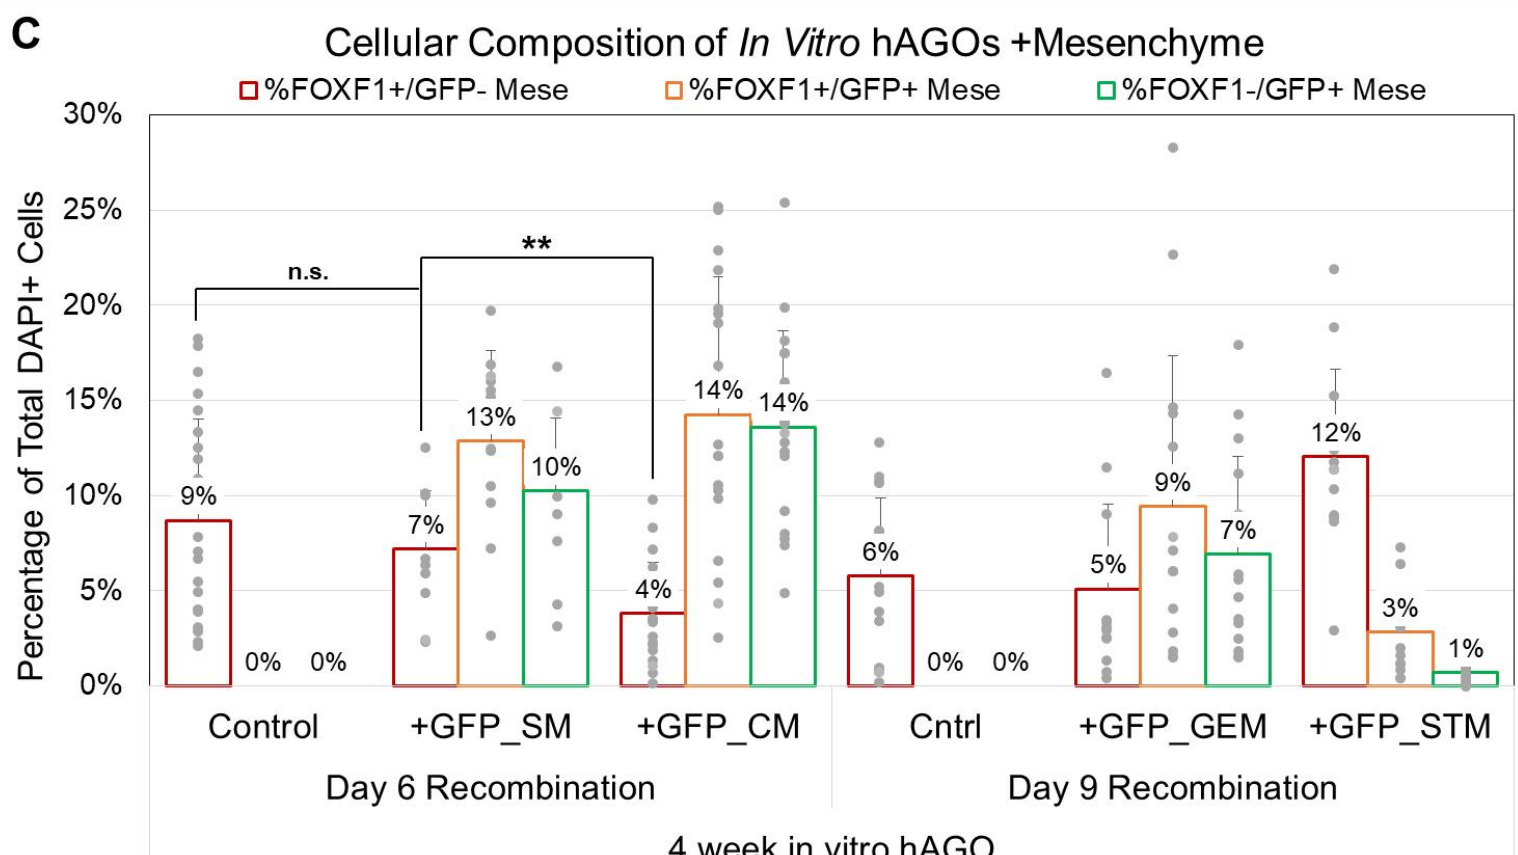

**Figure S1. Splanchnic mesenchymal recombination yielded the most added exogenous mesenchyme while still retaining endogenous mesenchyme, relating to Figure 1.** (A) Brightfield images of 4 week *in vitro* hAGOs recombined with varying concentrations of splanchnic and septum transversum (STM) mesenchyme on day 6 of hAGO protocol. (B) Brightfield images of hAGOs grown for 4 weeks *in vitro* with and without recombination with exogenous GFP-labeled gastric-esophageal mesenchyme (GEM) (green) costained with mesenchymal marker FOXF1 (red). Higher magnification images are shown to the right. This relates to Fig. 1D. (C) Quantification of various mesenchymal recombination techniques, including day 6 mesenchymal recombination (left) of either GFP+ splanchnic (SM) or cardiac (CM) mesenchyme and day 9 mesenchymal recombination (right) of either GFP+ GEM or STM mesenchyme (n=12-24 fields from at least 3 organoids per condition from one differentiation, same trend seen across at least two individually seeded differentiations, \*\*p<0.01, Student's t-test).



# Figure S2

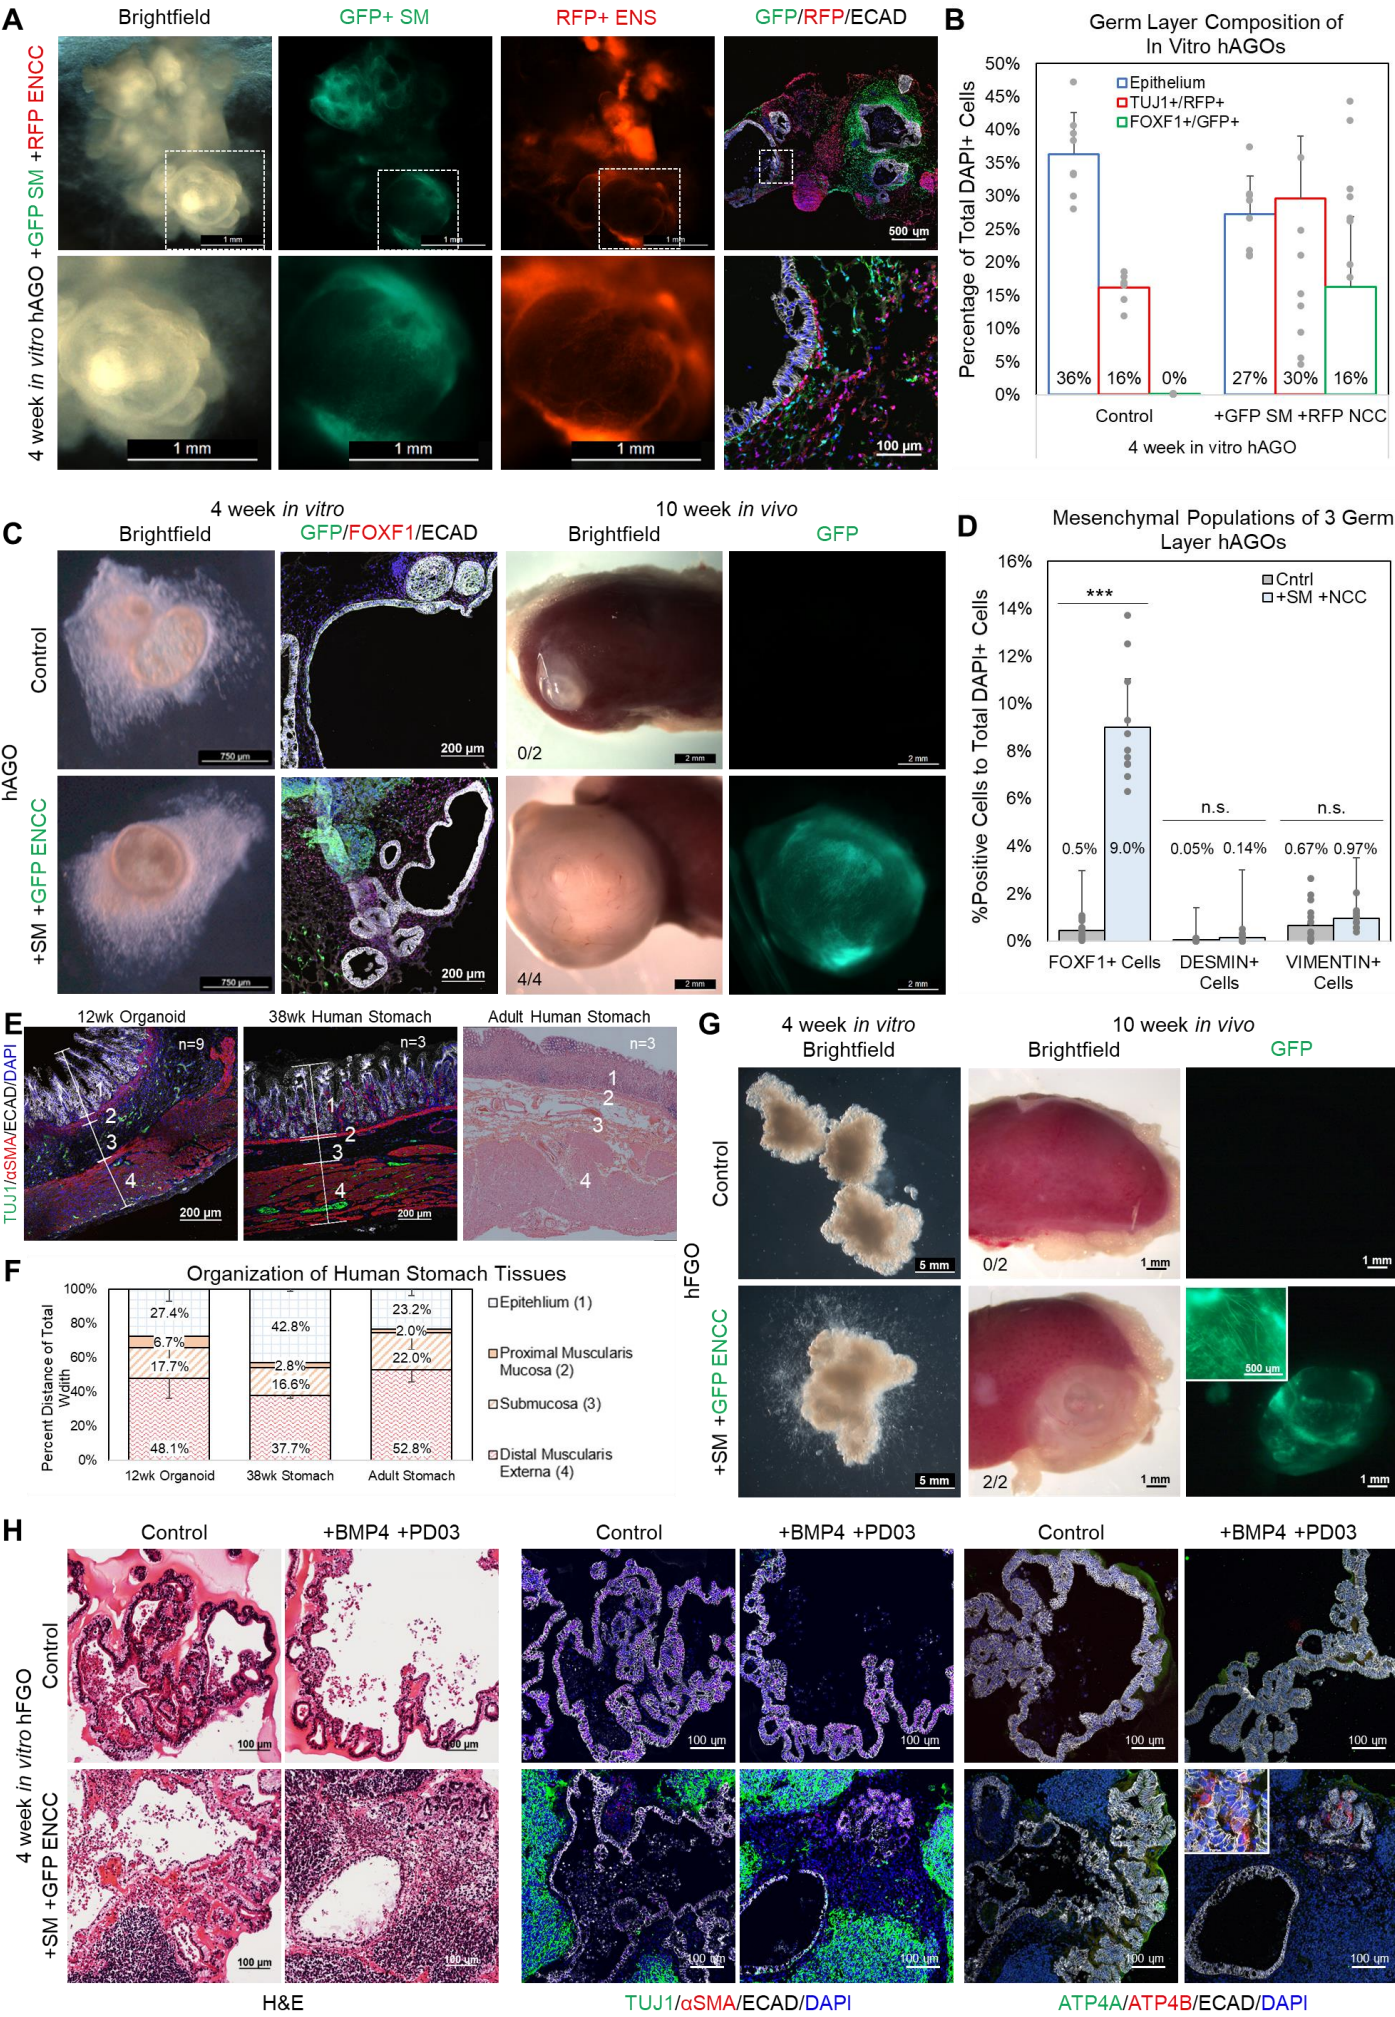

**Figure S2. Three germ layer *in vitro* and *in vivo* hAGOs and hFGOs contain GFP+ splanchnic mesenchyme and RFP+ ENCC, relating to Figure 3.** (A) Brightfield and fluorescent images of four week *in vitro* hAGO +GFP SM (green) +RFP ENCC (red) and epithelial ECAD (white). Higher magnification images are show on the bottom row. (B) Quantification of GFP+ mesenchyme, RFP+ neural, and ECAD+ epithelial populations within four week *in vitro* hAGOs (n=8 fields from at least 3 organoids from one differentiation, same trend seen across at least two individually seeded differentiations). (C) Representative images of gross *in vitro* and post transplantation hAGOs with and without incorporation of SM and GFP-labeled ENCC. GFP neurons formed networks around grafts post transplantations. (D) Quantification of mesenchymal populations within four week *in vitro* hAGOs (n=11-18 fields from at least 3 organoids from one differentiation, same trend seen across at least two individually seeded differentiations, \*\*\*p<0.001, Student's t-test). (E) Representative images and (F) quantification of the epithelial (1), proximal muscularis mucosa (2), submucosa (3), and distal muscularis externa (4) layer thickness from hAGOs 12 week post transplantation, 38 week old human fetal stomach, and adult stomach (n=3-9 fields from 3 hAGOs, 1 38 week fetal stomach, and 1 adult stomach). (G) Representative images of gross *in vitro* and post transplantation hFGOs with and without incorporation of SM and GFP-labeled ENCC. GFP neurons formed networks around grafts post transplantations (H) Representative histological (left) and immunofluorescent (middle and right) comparison of *in vitro* hFGOs with and without added SM and GFP ENCC as well as with and without added BMP4 and MEK pathway inhibitor PD03 to stimulate parietal cell differentiation. Neurons are labeled with TUJ1 (green, middle), smooth muscle with  $\alpha$ SMA (red, middle), and parietal cells with APT4A (green, right) and ATP4B (red, right). Epithelium is labeled with ECAD (white). Inset (right) highlighting ATP4B+ parietal cell differentiation in hFGOs with added SM and ENCC. ATP4A/ATP4B staining is representative of a maxIP rendered from a z-stack of images by Nikon NIS Elements.



# Figure S3

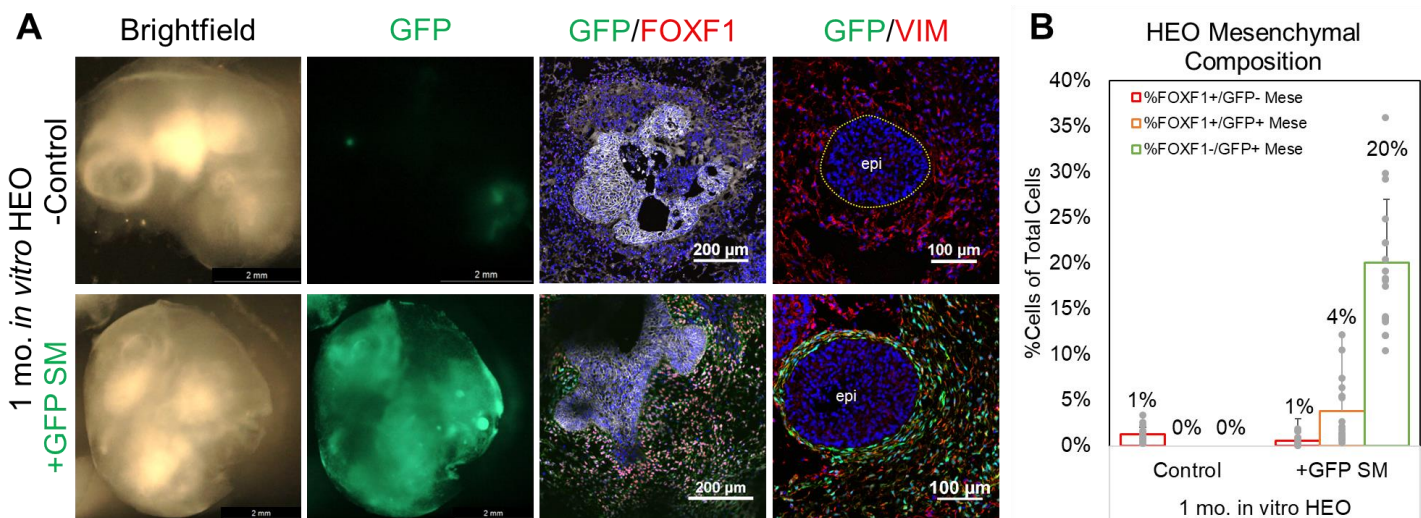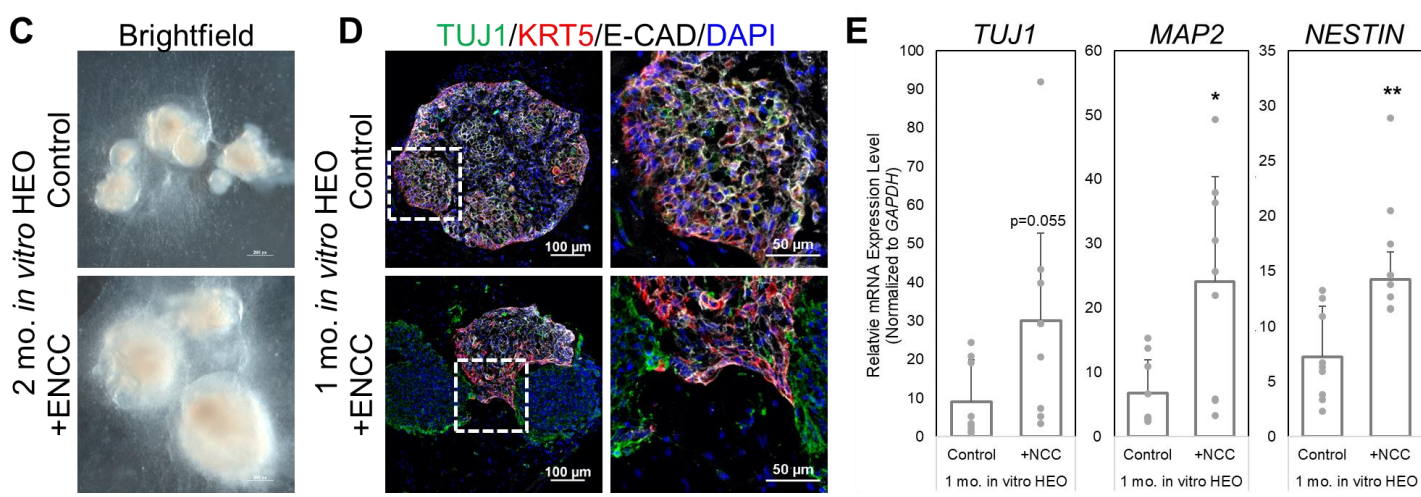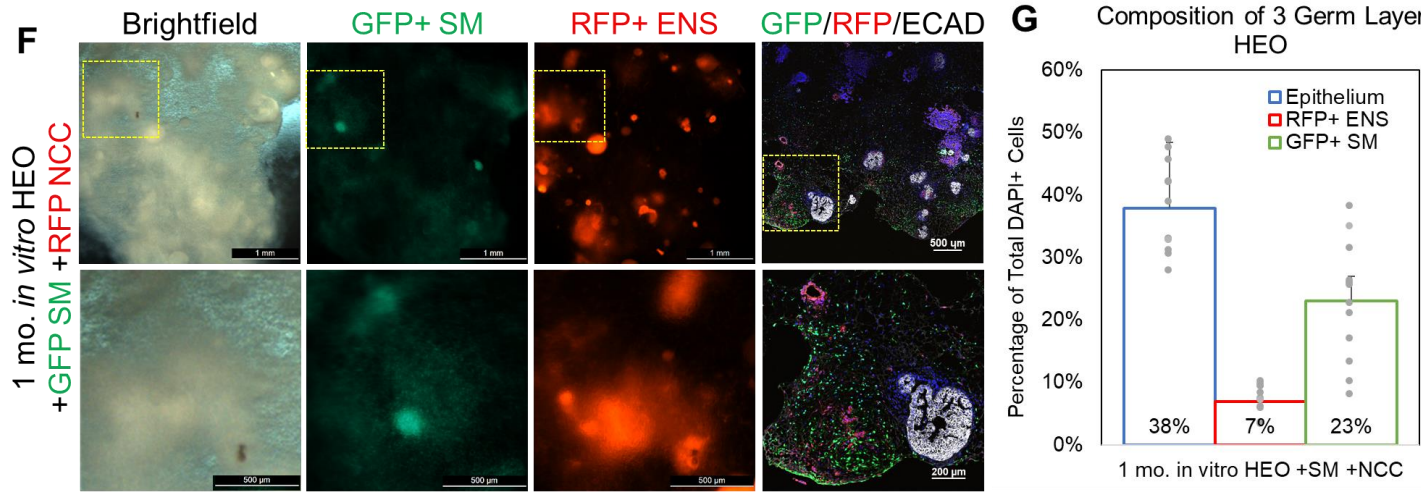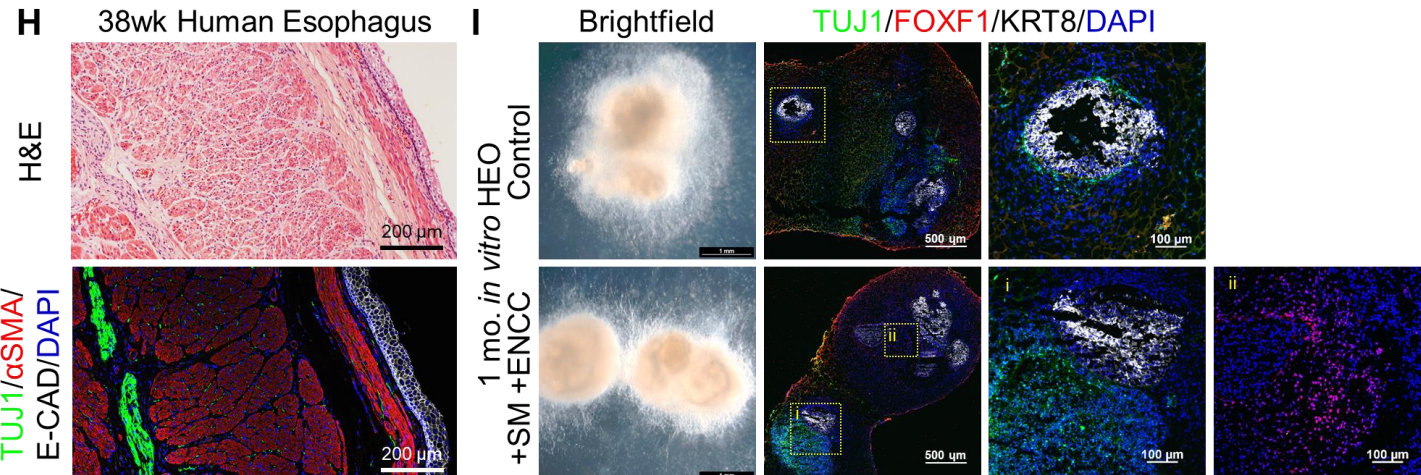

**Figure S3. Constructing three germ layer organoids *in vitro* is applicable to human esophageal organoids, relating to Figure 3.** (A) Brightfield and GFP-fluorescent images of 1 mo. *in vitro* HEOs. GFP cells label exogenous hPSC-derived SM. Immunofluorescent images of representative HEOs depicting GFP+ (green), FOXF1+ and Vimentin+ (red) mesenchymal cells. (B) Quantification of different mesenchymal populations within 1 mo. *in vitro* HEOs. FOXF1+/GFP- cells mark endogenous mesenchyme, while both GFP+ groups represent exogenous SM (n=16-18 fields from at least 3 organoids per condition from one differentiation, same trend seen across at least two individually seeded differentiations, \*\*p<0.01, \*\*\*p<0.001, Student's t-test). (C) Brightfield images of 2 mo. *in vitro* HEOs +/- ENCC. (D) Representative images of 1 mo. *in vitro* HEOs depicting TUJ1+ (green) enteric neurons surrounding the KRT5+ (red) and ECAD+ (white) epithelium of HEOs +ENCC. Higher magnification images are shown to the right. (E) Relative expression of neuronal-specific genes including tubulin genes, *TUJ1* and *MAP2*, and filament genes, *Nestin* within 1 mo. HEOs +ENCC (n=3, representative of 3 individual experiments, \*\*p<0.01, \*\*\*p<0.001, Student's t-test). (F) Brightfield and fluorescent images of 1 mo. *in vitro* HEOs +GFP SM +RFP ENCC and epithelial marker ECAD (white). Higher magnification images are shown on the bottom row. (G) Quantification of GFP+ mesenchymal, RFP+ neural, and ECAD+ epithelial populations within 1 mo. *in vitro* HEOs (n=12 fields from at least 3 organoids from one differentiation, same trend seen across at least two individually seeded differentiations). (F) Representative histological (top) and immunofluorescence (bottom) images of human 38 week esophagus stained with TUJ1 (green),  $\alpha$ SMA (red), and ECAD (white). (I) Representative brightfield and immunofluorescent images of 1 mo. *in vitro* HEOs +/- SM +/- ENCC marked with TUJ1+ (green) enteric neurons, FOXF1+ (red) mesenchyme, and KRT8+ (white) epithelium. Higher magnification images are shown to the right.



# Figure S4

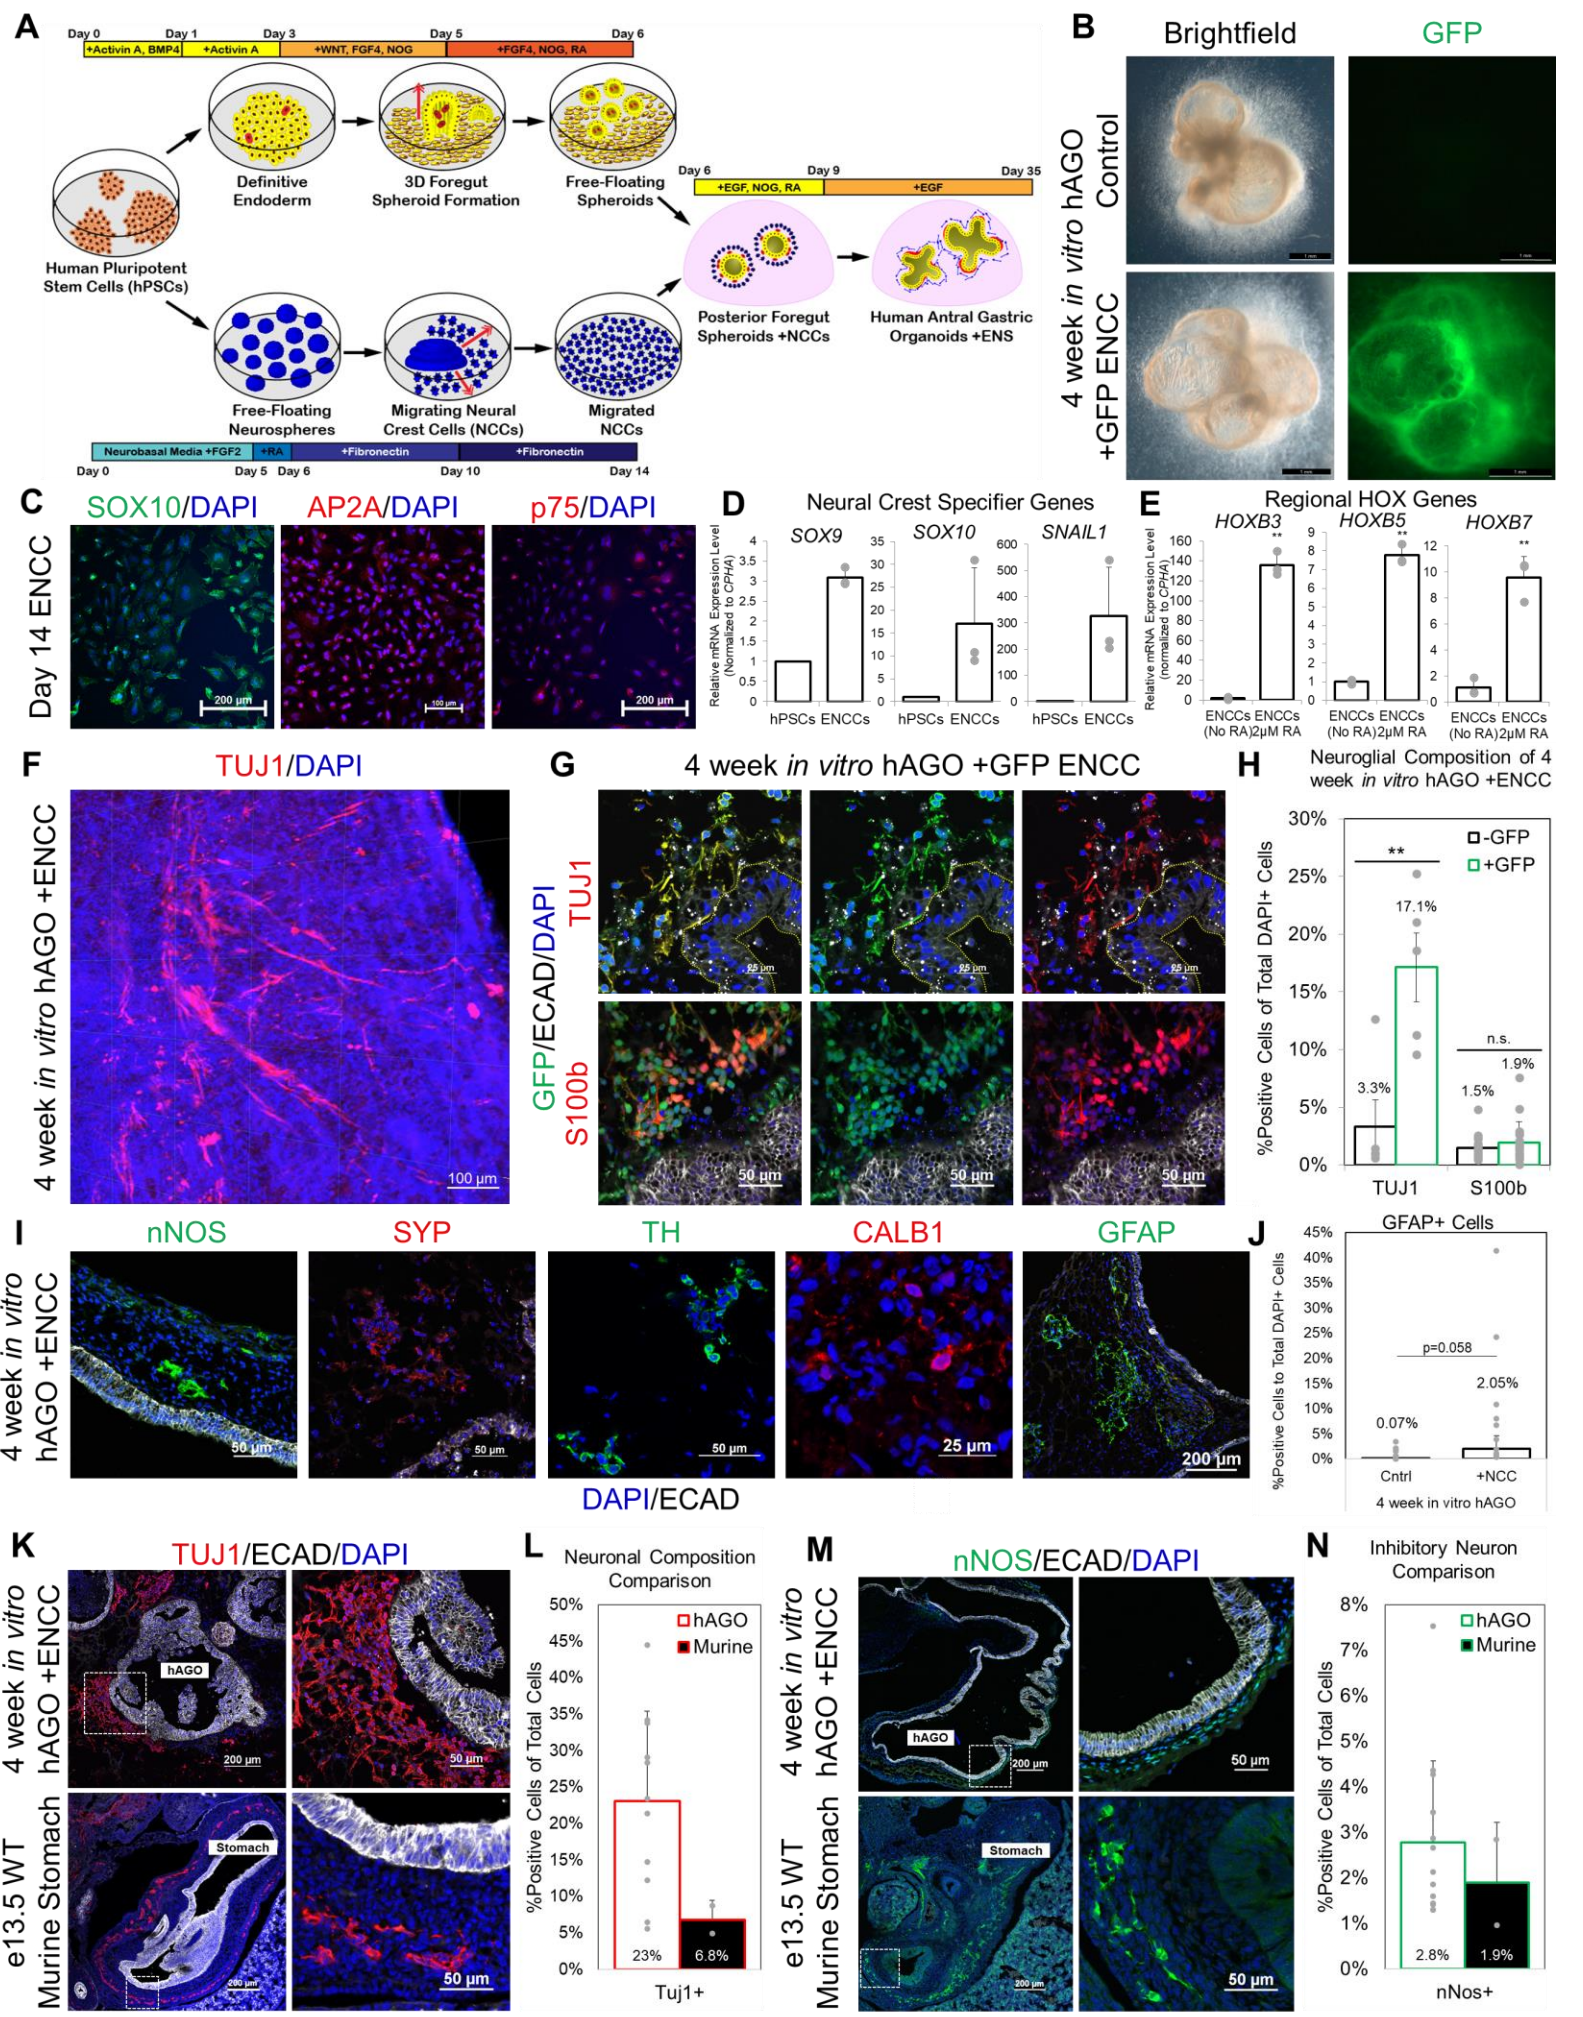

**Figure S4. hPSC-derived ENCCs differentiated into neuroglial subtypes when engineered into hAGOs without exogenous mesenchyme, relating to Figure 5. (A)** Schematic depicting detailed method of deriving and innervating hAGOs. **(B)** Representative brightfield (left) and GFP fluorescent (right) images of four week *in vitro* hAGOs with and without GFP+ ENCC. **(C)** Representative images of end time point, day 14, monolayer ENCCs stained for ENCC markers SOX10 (green, left), AP2A (red, middle), and p75 (red, right). **(D)** Relative expression of neural crest specifier genes (*SOX9*, *SOX10*, and *SNAIL2*), and **(E)** regional hox patterning genes (*HOXB3*, *HOXB5*, *HOXB7*) (n=3 wells from one differentiation, same trend seen across at least four individually seeded differentiations, \*\*p<0.01, Student's t-test). **(F)** Wholemound immunofluorescence of four week *in vitro* hAGO +ENCC labeled with TUJ1+ (red) neurons. **(G)** Representative images **(G)** and quantification **(H)** of TUJ1+ neurons (top) and S100b+ glial cells (bottom) co-expressed with GFP labeled ENCCs (n=6 fields from one differentiation, same trend seen across at least two individually seeded differentiations, \*\*\*p<0.001, Student's t-test). **(I)** Immunofluorescent images of specific neuronal subtypes, including inhibitory neurons (nNOS) and synaptophysin (SYNAP), dopaminergic neurons (TH), sensory neurons (CALB1), and glial fibrillary acidic protein (GFAP) in hAGOs +ENCC. **(J)** Quantification of GFAP+ cells in four week *in vitro* hAGO +ENCC (n=11-16 fields from at least 3 organoids from one differentiation, p-value determined using Student's t-test). Representative images **(K,M)** and quantification **(L,N)** of **(K,L)** TUJ1+ neurons (red) and **(M,N)** nNOS+ inhibitory neurons (green) within four week *in vitro* hAGOs +ENCC (top) and e13.5 WT murine stomach (bottom) (n>2 fields from one differentiation and one mouse; there is no significant difference). Epithelium is labelled with ECAD (white). Right panels are higher magnification insets of left panels.



# Figure S5

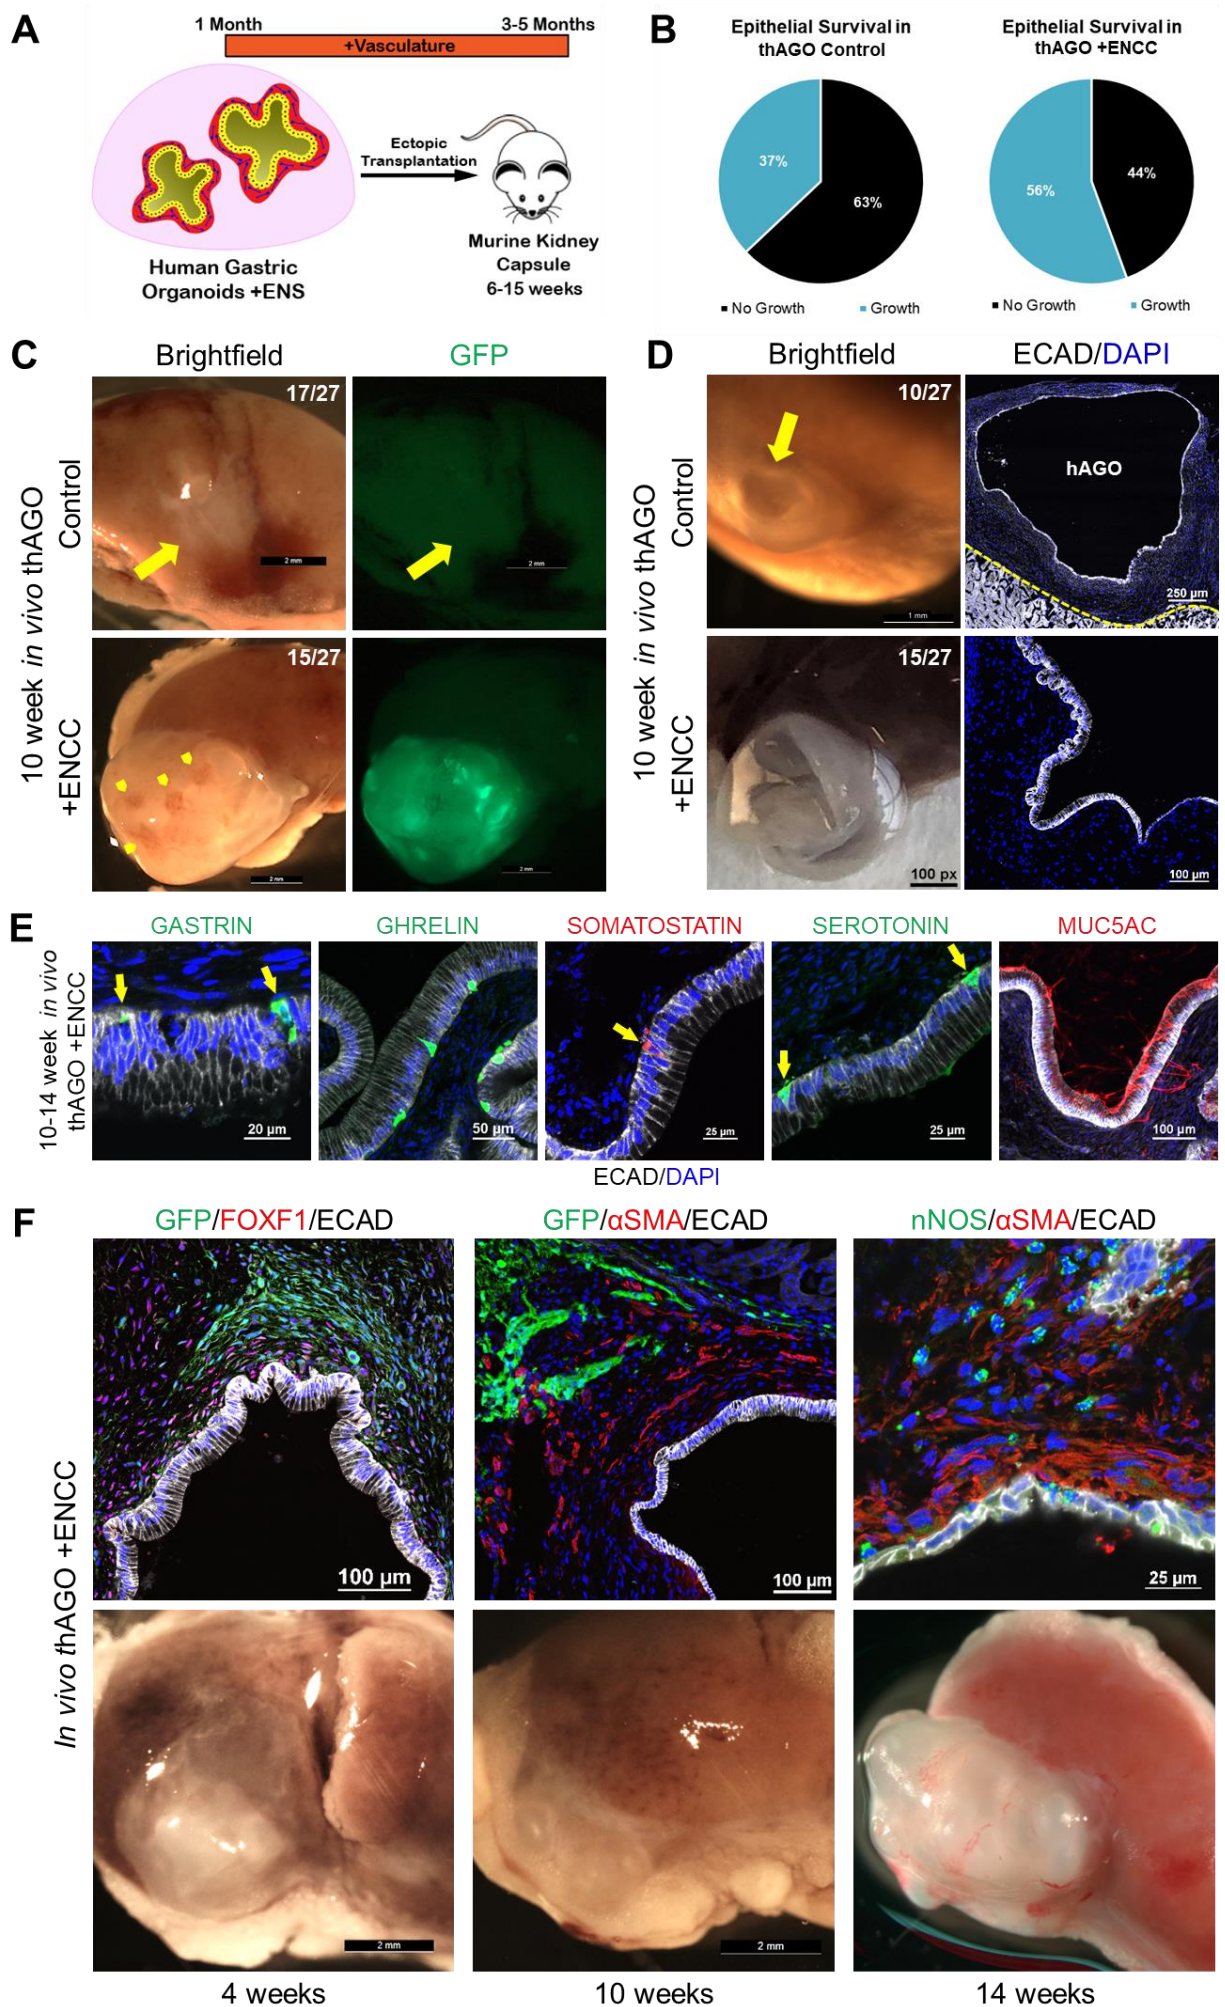

**Figure S5. ENS cells support *in vivo* growth and survival of hAGOs, relating to Figure 6.** (A) Schematic illustration the method of transplanting hAGOs +ENCC. (B) Quantification of epithelial growth from thAGOs with and without ENCC (n=46-48 transplants per condition from 6 individual differentiations). (C) Representative brightfield (left) and GFP fluorescent (right) images of thAGOs with and without GFP+ ENCC following *in vivo* transplantation (n=29). (D) Brightfield (left) and immunofluorescent (right) images of ECAD+ epithelium (white) from *in vivo* thAGOs with or without ENCC cystic grafts. Representative images of (E) differentiated antral epithelial and (F) mesenchymal and neuronal cell types in hAGOs +ENCC following *in vivo* growth. (E) Endocrine cells (yellow arrow) are marked with gastrin, ghrelin, somatostatin, and serotonin, as well as surface mucous cells marked by MUC5AC. (F) Mesenchymal cells are marked with FOXF1+ with smooth muscle marked with  $\alpha$ SMA. Lineage-traced hPSC-derived ENCCs are marked by GFP and differentiated inhibitory neurons are marked with nNOS. Sections were counterstained with epithelial marker ECAD (white) and nuclear DAPI (blue).



# Figure S6

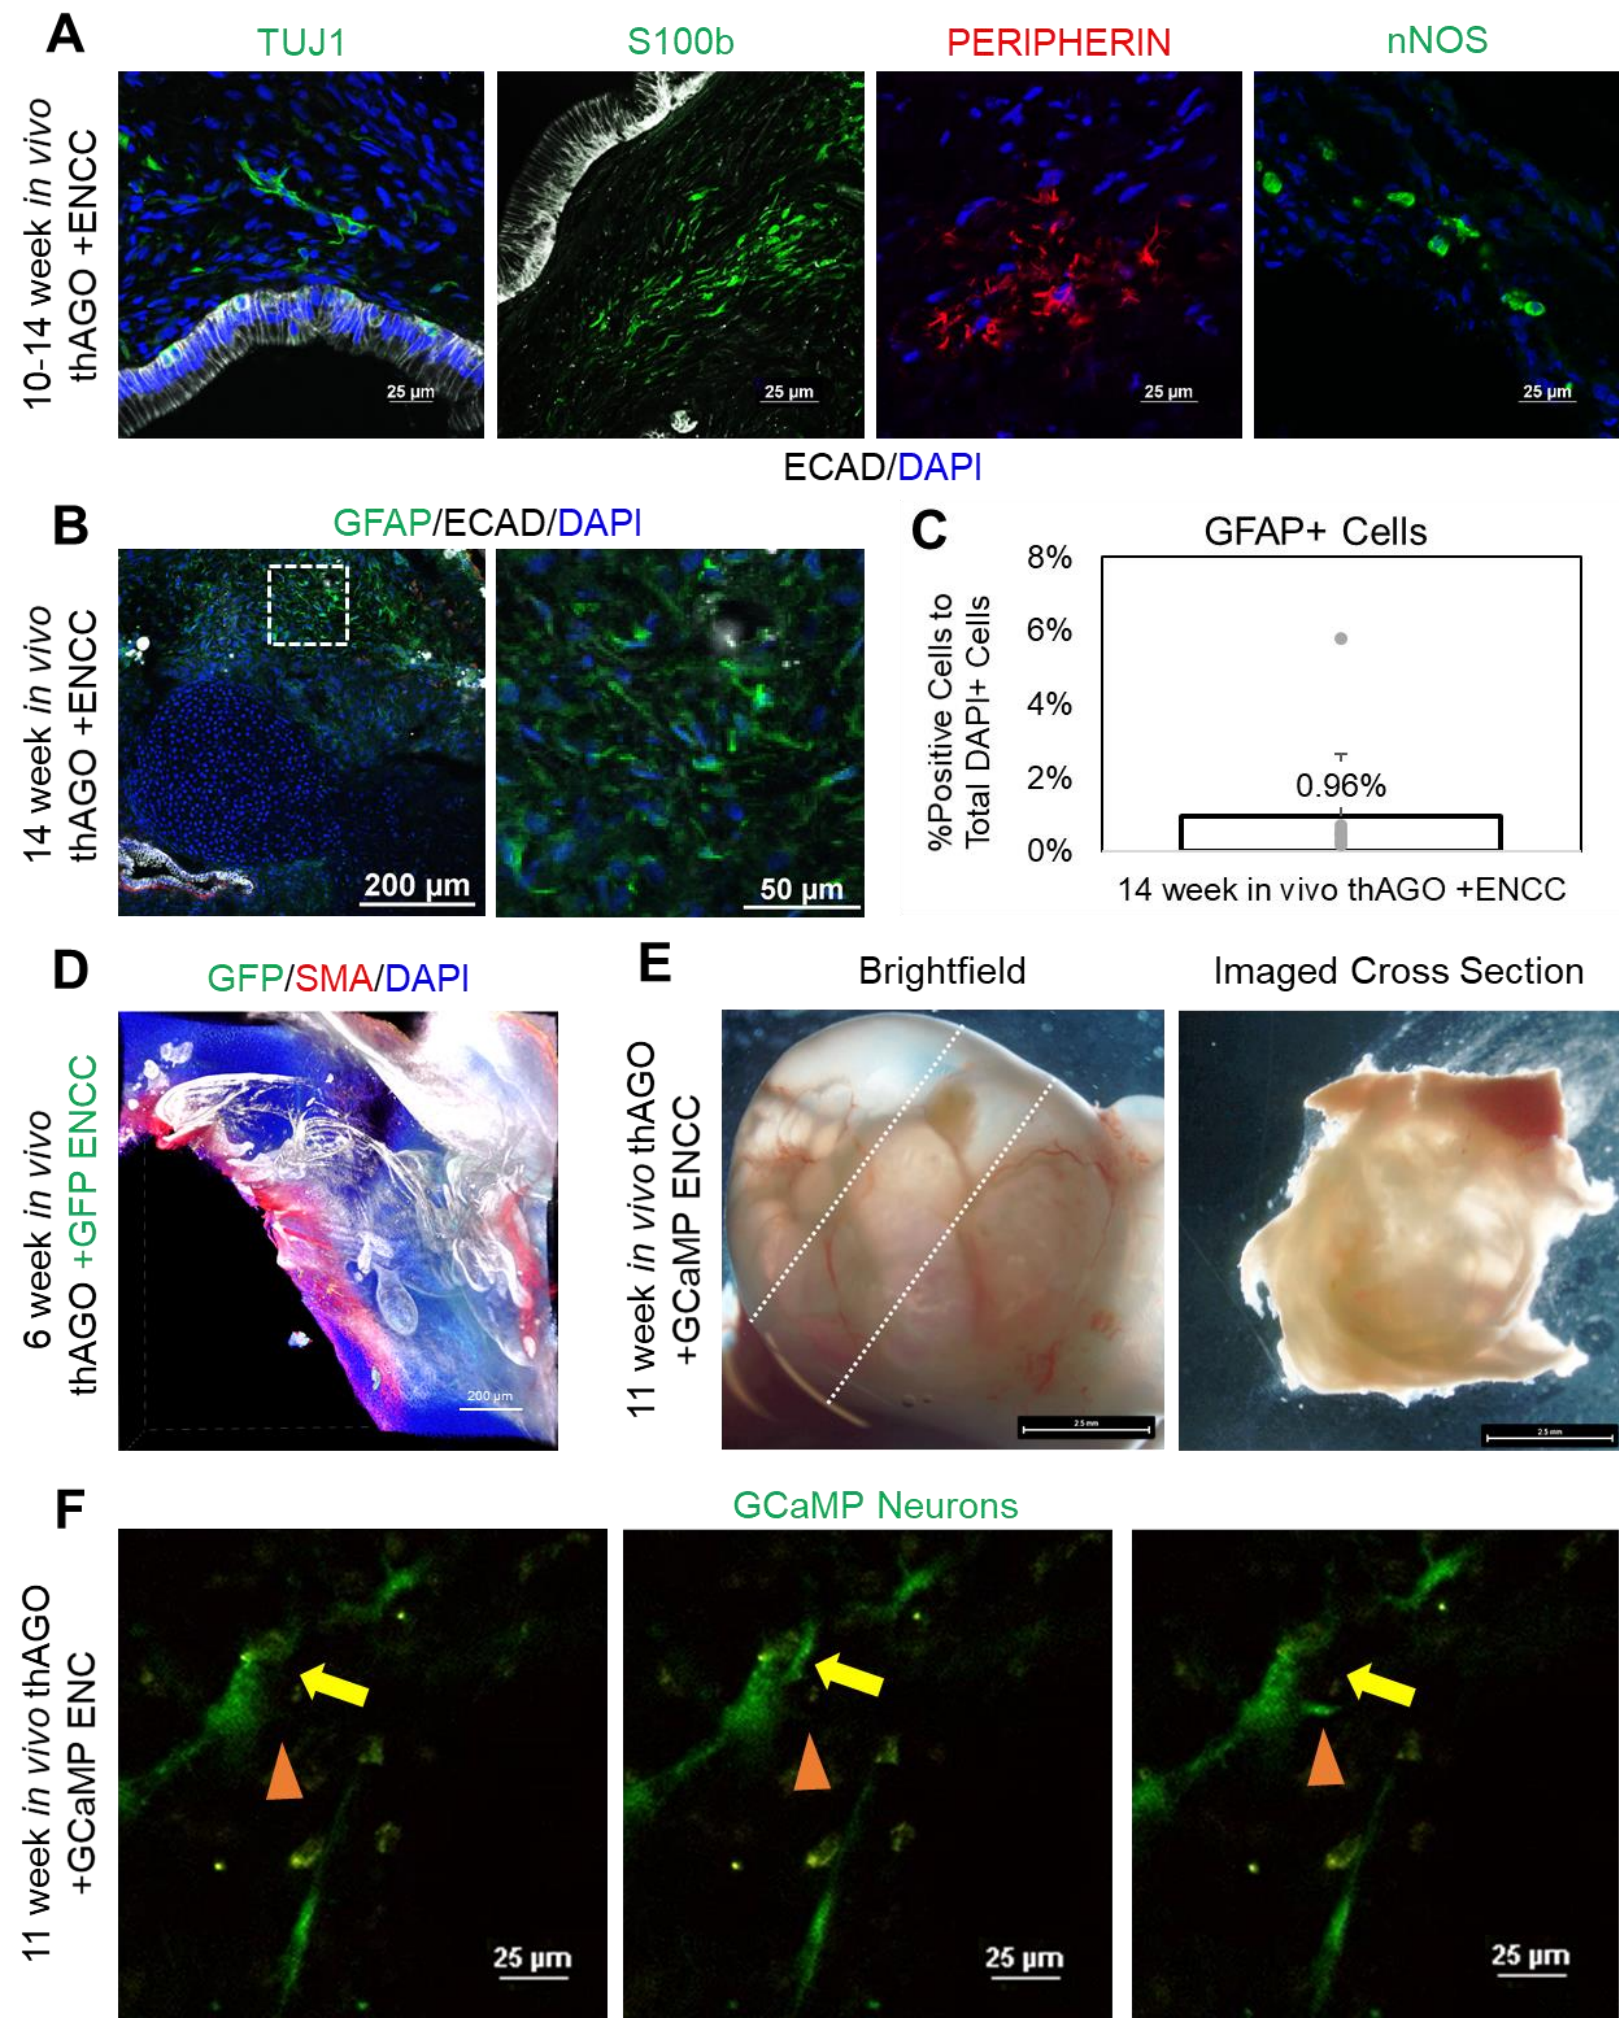

**Figure S6. Transplanted hAGO grafts +ENCC contain neuroglial cell types that are able to efflux calcium, relating to Figure 6. (A-B)** Immunofluorescent images of *in vivo* hAGOs +ENCC show presence of **(A)** TUJ1+ (green, left) neural and S100b+ (green, middle) glial cells as well as differentiated neuronal subtypes marked by peripherin (red, middle) and nNOS (green, right) and **(B)** GFAP+ glial cells (green). ECAD (white) marks the epithelium. **(C)** Quantification of GFAP+ cells in 14 week *in vivo* hAGO +ENCC (n=10 fields from at least 3 organoids from one differentiation). **(D)** Wholemout immunohistochemistry of *in vivo* hAGO +GFP ENCC show a 3D network formation of GFP+ (green) neurons within  $\alpha$ SMA+ (red) smooth muscle layers; ECAD (white) marks epithelium. **(E)** Gross morphology of *in vivo* hAGO +ENCC grafts used to obtain live images of GCaMP neuronal firing. **(F)** Static images of two individual GFP+ GCaMP neurons taken from live-imaged movie with neuronal firing indicated by a yellow arrow and orange triangle.



# Figure S7

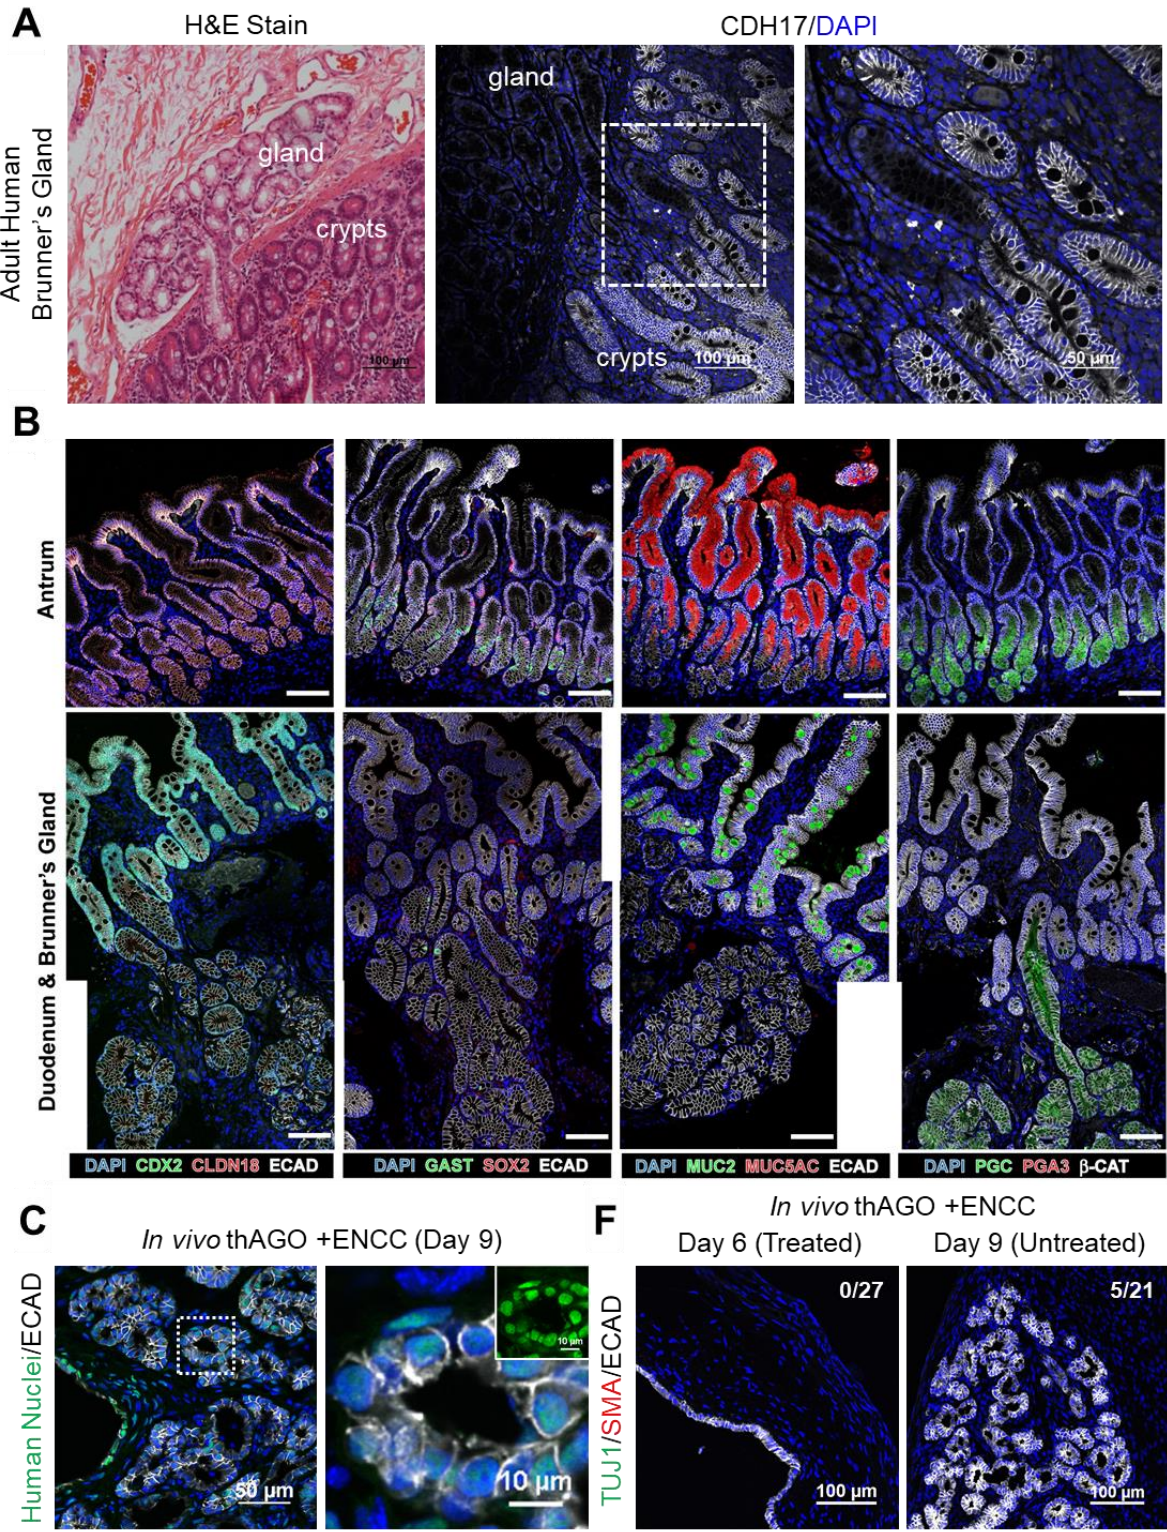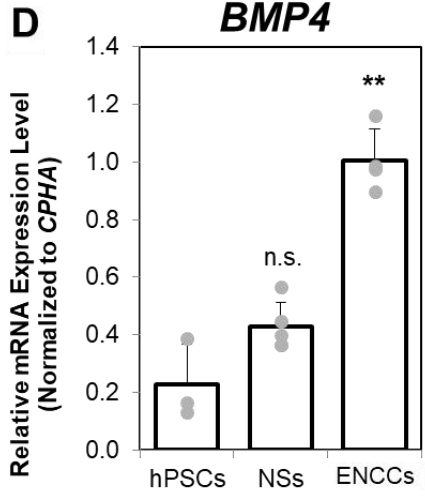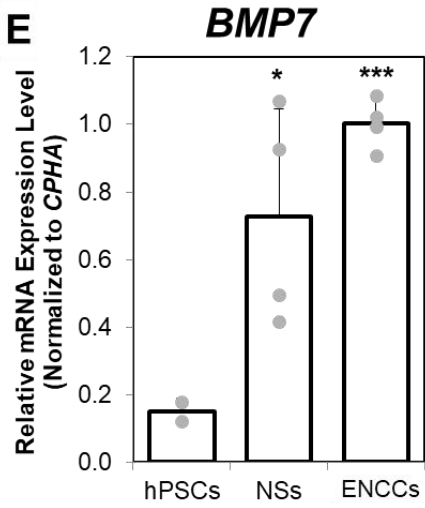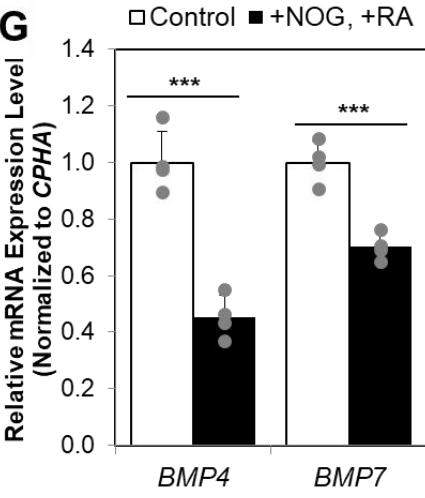

**Figure S7. Markers that define human Brunner's glands, their use to study PSC-derived Brunner's gland-like epithelium, and a possible role for ENCC-derived BMP ligands in Brunner's gland development, relating to Figure 7. (A)** H&E (left) and immunofluorescent (right) images of adult human Brunner's glands labeled with intestinal epithelial marker CDH17 (white). **(B)** Immunofluorescent comparison of adult human antrum (top) and duodenum and Brunner's glands (bottom). The gastric epithelial cell types are labeled with CLDN18, SOX2, MUC5AC, PGA3 (red), and PGC (green, right). Intestinal cell types are labeled with markers CDX2, and MUC2 (green). Endocrine hormone GAST (green, middle left) was observed in all regions. Only PGC and GAST (green) were consistently observed in Brunner's glands. Epithelium was labeled with ECAD or  $\beta$ -catenin (white). Duodenum and Brunner's glands images (bottom) are a composite of 2 individual 20x images manually overlaid. **(C)** Representative images of organoids with ECAD<sup>+</sup> epithelium (white) and human nuclei expression (green) from thAGOs +ENCC at day 9 of hAGO protocol; higher magnification is shown to the right. **(D-E)** Relative expression of BMP ligands, **(D)** *BMP4* and **(E)** *BMP7*, at different points of ENCC differentiation. hPSCs and day 6 neurospheres (NSs) were used to compare to ENCCs (n=3-4 wells of cells per condition, \*p<0.05, \*\*p<0.01, \*\*\*p<0.001, Student's t-test). **(F)** Representative images of organoids with ECAD<sup>+</sup> epithelium (white) from thAGOs +ENCC following recombination at either day 6 or day 9 of hAGO protocol. **(G)** Relative expression of BMP ligands with and without NOG and RA treatment (n=3-4 wells of cells per condition, \*\*\*p<0.001, Student's t-test).



**Table S1** Additional bright field images of *in vivo* hAGO grafts recombined with either SM, ENCCs, neither, or both, relating to Figure 2.

| <b>SPONTANEOUS</b>                                         |        |                                                                                     |              |
|------------------------------------------------------------|--------|-------------------------------------------------------------------------------------|--------------|
| <b>hAGO (Control)</b>                                      |        |                                                                                     |              |
| Recomb                                                     | Age    | Bright field                                                                        | Growth       |
| Recombined/<br>Embedded<br>on day 6 of<br>hAGO<br>protocol | 6 wks  |    | none         |
|                                                            |        |    | none         |
|                                                            |        |    | very little  |
|                                                            | 10 wks |    | very little  |
|                                                            |        |   | very little  |
|                                                            | 11 wks |  | none         |
|                                                            |        |  | small growth |
|                                                            |        |  | large growth |
|                                                            | 12 wks |  | none         |
|                                                            |        |  | none         |
|                                                            |        |  | none         |
|                                                            |        |  | small growth |
|                                                            | 14 wks |  | none         |

| Recombined/<br>Embedded<br>on day 9 of<br>hAGO<br>protocol | 6 wks  |    | very little                           |
|------------------------------------------------------------|--------|---------------------------------------------------------------------------------------|---------------------------------------|
|                                                            |        |    | small growth                          |
|                                                            | 10 wks |    | large growth                          |
|                                                            |        |    | cystic growth                         |
|                                                            | 11 wks |    | small growth                          |
|                                                            |        |    | large growth                          |
| <b>hAGO +ENCC</b>                                          |        |                                                                                       |                                       |
| Recomb                                                     | Age    | Bright field                                                                          | Growth                                |
| Recombined/<br>Embedded<br>on day 6 of<br>hAGO<br>protocol | 6 wks  |   | none                                  |
|                                                            |        |  | very little                           |
|                                                            |        |  | small growth;<br>fluid filled<br>cyst |
|                                                            | 7 wks  |  | none                                  |
|                                                            | 10 wks |  | large growth                          |
|                                                            | 11 wks |  | large growth<br>with<br>cartilage     |
|                                                            |        |  | large growth                          |
|                                                            |        |  | large<br>cystic<br>growth             |

|                                                            |        |                                                                                     |                                |
|------------------------------------------------------------|--------|-------------------------------------------------------------------------------------|--------------------------------|
|                                                            | 14wks  | 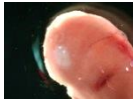   | none                           |
|                                                            |        |    | very little                    |
|                                                            |        |    | very little                    |
|                                                            |        |    | large growth                   |
|                                                            |        |    | large growth                   |
|                                                            |        |    | cystic growth                  |
|                                                            |        |    | cystic growth                  |
| Recombined/<br>Embedded<br>on day 9 of<br>hAGO<br>protocol | 6 wks  |   | none                           |
|                                                            |        |  | small growth                   |
|                                                            | 7 wks  |  | none                           |
|                                                            |        |  | very little                    |
|                                                            |        |  | none                           |
|                                                            | 11 wks |  | large growth w/ some cartilage |
|                                                            |        |  | large growth                   |

| hAGO +SM                                                   |        |                                                                                       |               |
|------------------------------------------------------------|--------|---------------------------------------------------------------------------------------|---------------|
| Recomb                                                     | Age    | Bright field                                                                          | Growth        |
| Recombined/<br>Embedded<br>on day 6 of<br>hAGO<br>protocol | 10 wks | 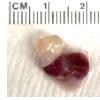   | large growth  |
|                                                            |        |    | large growth  |
| hAGO +SM +ENCC                                             |        |                                                                                       |               |
| Recomb                                                     | Age    | Bright field                                                                          | Growth        |
| Recombined/<br>Embedded<br>on day 6 of<br>hAGO<br>protocol | 10 wks |    | large growth  |
|                                                            |        |    | large growth  |
|                                                            |        |    | large growth  |
|                                                            |        |   | large growth  |
| Recombined/<br>Embedded<br>on day 9 of<br>hAGO<br>protocol | 10 wks |  | cystic growth |
|                                                            |        |  | cystic growth |



**Table S2** List of all neural markers assessed within *in vitro* and *in vivo* organoid cultures, relating to Figure 5.

| Protein Name Used in Figures | Protein Name/Type                                               | Neuroglia Cell Type                                | Functionality                                                                                           | Organoid Expression                                                                                                                                                            | Quantification for hAGO            |
|------------------------------|-----------------------------------------------------------------|----------------------------------------------------|---------------------------------------------------------------------------------------------------------|--------------------------------------------------------------------------------------------------------------------------------------------------------------------------------|------------------------------------|
| TUJ1                         | neuron-specific class III $\beta$ -tubulin protein              | differentiated human neural progenitor cells       | microtubule stability in neuronal cell bodies and axons; axonal transport                               | 4 wk <i>in vitro</i> hAGOs +ENCC (Fig. 5B, Supp. Figs. S4G,K); 4 wk <i>in vitro</i> HEOs +ENCC (Fig. S3D); 10-12 wk <i>in vivo</i> hAGOs and hFGOs +SM +ENCC (Figs. 3C-D, S6A) | ~20-25% <i>in vitro</i> (Fig. S4H) |
| S100 $\beta$                 | calcium-binding protein B                                       | pan-glial; astrocytes                              | regulates proliferation and differentiation; microtubule assembly and neurite extension; calcium efflux | 4 wk <i>in vitro</i> hAGOs +ENCC (Fig. S4G); 10-14 wk <i>in vivo</i> hAGOs +ENCC (Fig. S6A)                                                                                    | ~5% <i>in vitro</i> (Fig. S4H)     |
| nNOS                         | nitric oxide synthase enzyme                                    | nitroergic inhibitory motoneurons                  | relaxation of smooth muscle                                                                             | 4 wk <i>in vitro</i> hAGOs +ENCC (Figs. S4I,M); 10-14 wk <i>in vivo</i> hAGOs +ENCC (Figs. S5F, S6A)                                                                           | ~3% <i>in vitro</i> (Fig. S4N)     |
| GFAP                         | glial fibrillary acidic protein, type III intermediate filament | non-myelinating Schwann cells; enteric glial cells | maintaining cytoskeletal structure/mechanical strength                                                  | 4 wk <i>in vitro</i> hAGOs +ENCC (Figs. S4I); 14 wk <i>in vivo</i> hAGOs +ENCC (Fig. S6B)                                                                                      | ~1% <i>in vivo</i> (Fig. S6C)      |
| SYP                          | synaptophysin, major synaptic vesicle protein                   | interneurons                                       | neuro-transmitter                                                                                       | 4 wk <i>in vitro</i> hAGOs +ENCC (Fig. S4I)                                                                                                                                    | N/A                                |
| CHAT                         | choline acetyltransferase                                       | cholinergic neurons' motoneurons                   | neuro-transmitter                                                                                       | 10 wk <i>in vivo</i> hAGO +SM +ENCC (Fig. 2D)                                                                                                                                  | N/A                                |
| TH                           | tyrosine hydroxylase enzyme                                     | dopaminergic peripheral sympathetic neurons        | neuro-transmitter                                                                                       | 4 wk <i>in vitro</i> hAGOs +ENCC (Fig. S4I); 10 wk <i>in vivo</i> hAGO +SM +ENCC (Fig. 2D)                                                                                     | N/A                                |
| CALB1                        | calbindin 1, calcium-binding protein                            | excitatory motoneurons; intrinsic sensory neurons  | mediates calcium absorption                                                                             | 4 wk <i>in vitro</i> hAGOs +ENCC (Fig. S4I)                                                                                                                                    | N/A                                |
| PRPH                         | peripherin, type III intermediate filament                      | peripheral neurons                                 | neurite elongation and axonal guidance during development                                               | 10-14 wk <i>in vivo</i> hAGO +ENCC (Fig. S6A)                                                                                                                                  | N/A                                |

**Table S3** List of oligonucleotides, relating to Key Resource Table.

| REAGENT or RESOURCE                    | SOURCE                            | IDENTIFIER        |
|----------------------------------------|-----------------------------------|-------------------|
| Oligonucleotides                       |                                   |                   |
| <i>BAPX1</i> F: CAACACCGTCGTCCTCG      | Integrated DNA Technologies (IDT) | N/A (synthesized) |
| <i>BAPX1</i> R: CCGCTTCCAAAGACCTAGAG   | IDT                               | N/A (synthesized) |
| <i>BARX1</i> F: CCAGTGGGAACCTTGAACACC  | IDT                               | N/A (synthesized) |
| <i>BARX1</i> R: CTGAAGTTCGGCGTGCAG     | IDT                               | N/A (synthesized) |
| <i>BMP4</i> F: CAAACTTGCTGGAAAGGCTC    | IDT                               | N/A (synthesized) |
| <i>BMP4</i> R: CCGCTACTGCAGGGACCTAT    | IDT                               | N/A (synthesized) |
| <i>BMP7</i> F: CGATTTTCAGCCTGGACAACG   | IDT                               | N/A (synthesized) |
| <i>BMP7</i> R: CCTGGGTACTGACACGG       | IDT                               | N/A (synthesized) |
| <i>CPHA</i> F: CCCACCGTGTTCTTCGACATT   | IDT                               | N/A (synthesized) |
| <i>CPHA</i> R: GGACCCGTATGCTTTAGGATGA  | IDT                               | N/A (synthesized) |
| <i>FGF10</i> F: TGCTGTTAATGGCTTTGACG   | IDT                               | N/A (synthesized) |
| <i>FGF10</i> R: AGAAGAACGGGAAGGTCAGC   | IDT                               | N/A (synthesized) |
| <i>FOXF1</i> F: CGTCCTCTTCCATGCACTCG   | IDT                               | N/A (synthesized) |
| <i>FOXF1</i> R: TTTTGAGGGAGTGAGGAAGG   | IDT                               | N/A (synthesized) |
| <i>GAPDH</i> F: CCCATCACCATCTTCCAGGAG  | IDT                               | N/A (synthesized) |
| <i>GAPDH</i> R: CTTCTCCATGGTGGTGAAGACG | IDT                               | N/A (synthesized) |
| <i>ISL1</i> F: TCACGAAGTCGTTCTTGCTG    | IDT                               | N/A (synthesized) |
| <i>ISL1</i> R: CATGCTTTGTTAGGGATGGG    | IDT                               | N/A (synthesized) |
| <i>MAP2</i> F: TTCGTTGTGTCGTGTTCTCA    | IDT                               | N/A (synthesized) |
| <i>MAP2</i> R: AACCGAGGAAGCATTGATTG    | IDT                               | N/A (synthesized) |
| <i>NESTIN</i> F: GAGGGAAGTCTTGGAGCCAC  | IDT                               | N/A (synthesized) |
| <i>NESTIN</i> R: AAGATGTCCCTCAGCCTGG   | IDT                               | N/A (synthesized) |
| <i>SIX2</i> F: CGGGTTGTGGCTGTTAGAAT    | IDT                               | N/A (synthesized) |
| <i>SIX2</i> R: CACCACACAGGTCAGCAACT    | IDT                               | N/A (synthesized) |
| <i>TUJ1</i> F: CGATGCCATGCTCATCAC      | IDT                               | N/A (synthesized) |
| <i>TUJ1</i> R: CCCAGTATGAGGGAGATCGT    | IDT                               | N/A (synthesized) |
